# Supplementary material for: A New Set-up of Vanishing Antibodies: A Biennial Follow-up of Five Different Clients’ Humoral Responses Against Sars-Cov-2 After Systemic Vaccination in an Oncology Hospital in Poland
Source: Preprints.org preprint supplement (doi:10.20944/preprints202210.0057.v2), 2022-12-01
Supplement: Supplementary file 1 [file supplementary]

*Dear Madame/Sir,*

*In our manuscript submitted, the results presented are based on the research performed at Maria Skłodowska-Curie Oncology Center in Białystok on 5 participants, and they include:*

- laboratory criteria (e.g. cut-off for SARS CoV-2 IgG on level 0,2 AU/ml), allowing the find out healthy and unvaccinated convalescents who passed SARS-CoV-2 asymptotically, which had diagnostic and therapeutic implications for further oncology treatment.*
- a proposal for a method of assessing immunity after SARS CoV-2 exposition and after COVID-19 planned vaccination in prevention to oncology treatment using measurement IgG-specific and S-RBD.*

*The work sent by us is a voice in the discussion for a need to introduce a third and additional dose of vaccine at a particular proper time to prevent SARS CoV-2 infection, especially for people elderly and immunosuppressive. In that population, functional immunodeficiency is a risk factor for developing clinically severe infections.*

*Counting on a substantive and kind evaluation of our work, we express our respect,*

*Piotr Kosiorek MD, PhD*
